# Supplementary material for: Intrinsically aggregation-prone proteins form amyloid-like aggregates and contribute to tissue aging in Caenorhabditis elegans
Source: eLife journal article supplement (doi:10.7554/elife.43059), 2019-05-03

Figure supplement 7

**A** Pharyngeal KIN-19::tagRFP aggregation

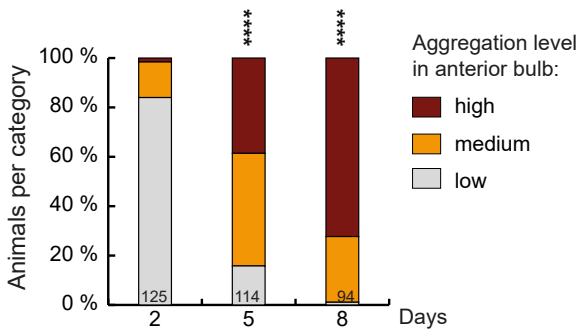

**B** Body-wall muscle KIN-19::tagRFP aggregation

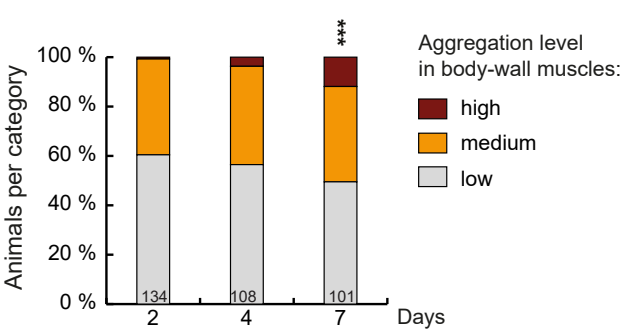

**C** Pharyngeal RHO-1::tagRFP aggregation

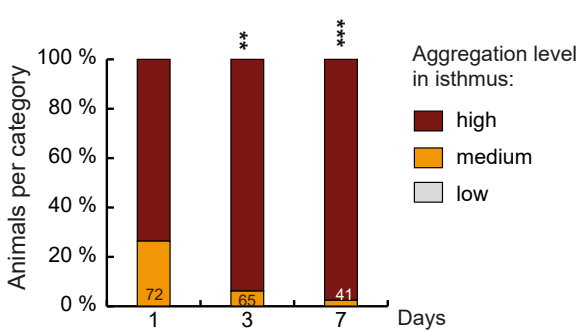

**D** Body-wall muscle RHO-1::venus aggregation

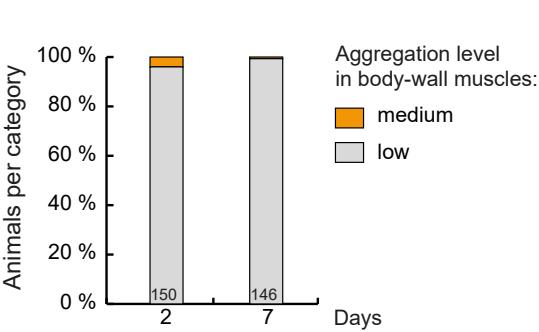

**E** Pharyngeal KIN-19::tagRFP

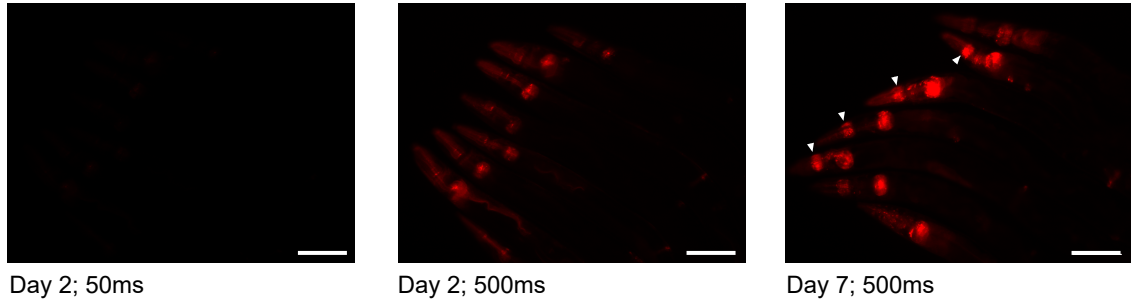

Pharyngeal RHO-1::tagRFP

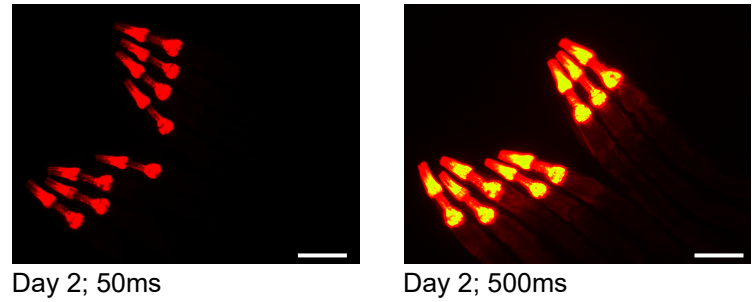

**F** Body-wall muscle RHO-1::venus

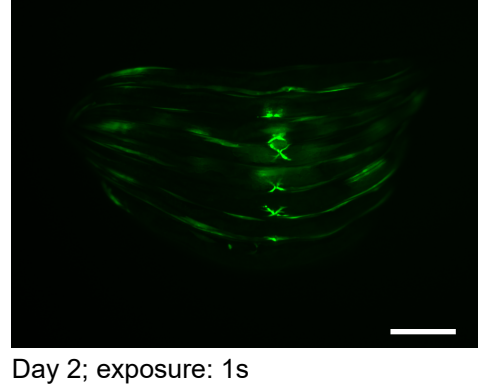

Body-wall muscle KIN-19::tagRFP

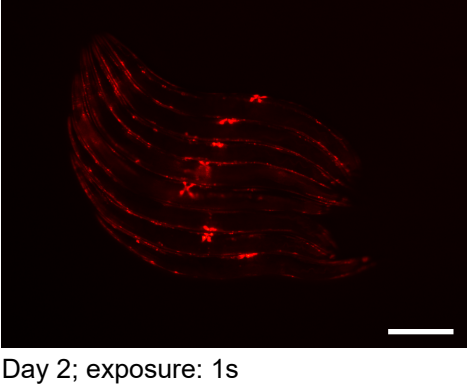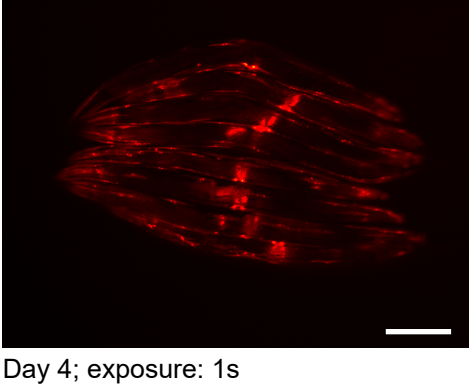

Supplement: supp [file elife-43059-supp-v1.zip]
