# Supplementary material for: Intrinsically aggregation-prone proteins form amyloid-like aggregates and contribute to tissue aging in Caenorhabditis elegans
Source: eLife journal article supplement (doi:10.7554/elife.43059), 2019-05-03
Supplement: supp [file elife_poa_e43059_Supplementary_file_1.xlsx]

## Sheet: Figure 1
Supplementary file 1: source data
Figure 1
Figure 1A
Strain: DCD69										Strain: DCD69
Aggregation categories:										Independent biological repeat:
low	> 10 puncta in the head or the middle body region
medium	>10 puncta in the head and the middle body region
high	>10 puncta in head, middle body and tail region
	green			red			N				green			red			N
	low	medium	high	low	medium	high					low	medium	high	low	medium	high
Before conversion day 5	31	42	9				82			after conversion day 2	91	11		16	79	7	102
after conversion	73	9		27	45	10	82			+24 h	75	23		30	63	2	98
+24 h	61	20		31	43	7	81			+48 h	49	44		42	46		93
+48 h	46	32		38	39	1	78
										Fisher's exact test
Fisher's exact test										Comparing low versus medium + high aggregation levels
Comparing low versus medium + high aggregation levels										vs AC	green	red
vs AC	green	red								+24 h	0.023	0.0112
+24 h	0.0252	0.515								+48 h	<0.00001	<0.00001
+48 h	<0.00001	0.0534
Fisher's exact test
Comparing low + medium versus high aggregation levels
vs AC	green	red
+24 h	N.A.	0.6096
+48 h	N.A.	0.0094
Figure 1B
Strain: CF3706
Aggregation categories:
low	<10 puncta in anterior bulb									Strain: CF3706									Strain: CF3706
medium	between 10< puncta <100 in anterior bulb									Independent biological repeat (without cycloheximide):									Independent biological repeat (without cycloheximide):
high	>100 puncta in anterior bulb
	CHX	green			red			N			green			red			N			green			red			N
		low	medium	high	low	medium	high				low	medium	high	low	medium	high				low	medium	high	low	medium	high
Before conversion day 5	no	60	45	5				110		after conversion day 5	98	24		49	62	11	122		after conversion day 5	96	36		38	75	18	132
Before conversion day 5	yes	54	48	7				109		+24 h	67	51		61	56		118		+24 h	61	65	4	50	70	10	130
after conversion	no	80	27		60	41	6	107		+48 h	46	62	4	67	45		112		+48 h	40	70	17	57	66	4	127
after conversion	yes	79	28		58	42	7	107		Fisher's exact test									Fisher's exact test
+24 h	no	46	54	2	68	32	2	102		Comparing low versus medium + high aggregation levels									Comparing low versus medium + high aggregation levels
+24 h	yes	72	26		60	35	3	102		vs AC	green	red							vs AC	green	red
+48 h	no	33	55	9	64	32	1	97		+24 h	<0.0001	0.0701							+24 h	< 0.00001	0.1173
+48 h	yes	63	30		56	34	3	97		+48 h	<0.0001	0.0039							+48 h	< 0.00001	0.0098
Fisher's exact test
Comparing low versus medium + high aggregation levels
Without CHX
vs AC	green	red
+24 h	< 0.00001	0.1169
+48 h	< 0.00001	0.1545
With CHX
vs AC	green	red
+24 h	1	0.3254
+48 h	0.3536	0.4742

## Sheet: Supplementary figure 1
Supplementary figure 1
Supplementary Figure 1C
	Body-wall muscle KIN-19::mEOS2			Pharynx KIN-19::mEOS2
time (s)	Mean RFI (%)	SD	N	Mean RFI (%)	SD	N
0	100	0	6	100	0	6
6	25.6562	9.99861	6	32.7002	11.1472	6
66	27.3849	11.7381	6	36.4461	8.05913	6
126	27.1744	11.7294	6	37.3489	8.25419	6
186	25.5577	12.9867	6	38.3141	15.1431	6
Supplementary Figure 1D
	Pharynx mEOS2
time (s)	Mean RFI (%)	SD	N
0	100	0	6
6	95.9519	4.11914	6
11	98.8448	2.90021	6
16	95.5136	4.79393	6
21	99.0362	3.91644	6
26	95.6602	5.2807	6
Supplementary Figure 1E
Strain: CF3706
Aggregation categories:
low	<10 puncta in anterior bulb
medium	between 10< puncta <100 in anterior bulb
high	>100 puncta in anterior bulb
	CHX	green			red			N
		low	medium	high	low	medium	high
Before conversion day 2	no	91	38					129
Before conversion day 2	yes	88	40					128
after conversion	no	124	7		95	35		131
after conversion	yes	123	3		91	37		126
+24 h	no	108	22		98	32		130
+24 h	yes	120	7		95	32		127
+48 h	no	93	37		101	29		130
+48 h	yes	111	10		89	32		121
Fisher's exact test
Comparing low versus medium + high aggregation levels
Without CHX
vs AC	green	red
+24 h	0.0031	n.s.
+48 h	< 0.00001	n.s.
With CHX
vs AC	green	red
+24 h	0.3339	n.s.
+48 h	0.0472	n.s.

## Sheet: Figure 2
Figure 2
	REPEAT 1								REPEAT 2 (independent biological repeat)
	Control		KIN-19		RHO-1				Control		KIN-19		RHO-1
day1	1	2987.61	1	2889.25	1	2858.5		day1	1	2936.13	1	2894.52	1	2837.17
	2	2993.76	2	2850.64	2	2856.76			2	2898.71	2	2857.15	2	2796.92
	3	2986.22	3	2848.08	3	2926.4			3	2899.95	3	2995.39	3	2871.82
	4	2954.98	4	2871.22	4	2880.79			4	2919.08	4	2965.06	4	2892.31
	5	2949.78	5	2840.02	5	2934.07			5	2969.49	5	2851.65	5	2865.63
	6	2974.27	6	2880.95	6	2893.31			6	2943.21	6	2815.66	6	2827.9
	7	2998.29	7	2852.9	7	2945.03			7	2955.6	7	2841.03	7	2780.46
	8	2966.9	8	2863.43	8	2854.71							8	2840.22
	9	2947.43			9	2896.53
					10	2942.99
	Control		KIN-19		RHO-1				Control		KIN-19		RHO-1
day7	1	2918.26	1	2830.14	1	2700.16		day7	1	2854.6	1	2876.39	1	2575.9
	2	2851.95	2	2831.27	2	2793.51			2	2987.11	2	2824.55	2	2682.82
	3	2921.18	3	2877.42	3	2746.63			3	2918.4	3	2844.7	3	2712.36
	4	2886.95	4	2818	4	2700.38			4	2889.46	4	2773.01	4	2752.18
	5	2876.47	5	2805.02	5	2726.59			5	2941.2	5	2773.54	5	2725.45
	6	2925.27	6	2821.23	6	2737.72			6	2901.93	6	2801.66	6	2742.12
	7	2930.77	7	2918.46	7	2731.13			7	2976.26	7	2806.66	7	2718.03
			8	2836.43	8	2776.95					8	2770.55	8	2710.92
					9	2766.89					9	2824.44	9	2608.12
					10	2771.33							10	2589.74
	Control		KIN-19		RHO-1				Control		KIN-19		RHO-1
day12	1	2893.89	1	2804.62	1	2728.11		day12	1	2844.77	1	2852.63	1	2674.5
	2	2937.99	2	2896.12	2	2686.17			2	2871.9	2	2856.06	2	2708.83
	3	2927.59	3	2853.76	3	2761.17			3	2889.74	3	2878.32	3	2723.83
	4	2926.28	4	2866.31	4	2741.69			4	2857.07	4	2853.81	4	2682.73
	5	2923.45	5	2868.72	5	2726.49			5	2888.56	5	2838.34	5	2699.66
	6	2963.68	6	2799.9	6	2735.58			6	2879.95	6	2884.77	6	2698.2
	7	2950.51	7	2889.43	7	2711.57			7	2846.49	7	2767.77	7	2659.62
	8	2958.51			8	2632.59							8	2695.6
Control	DCD248
KIN-19	DCD179
RHO-1	DCD146

## Sheet: Supplementary Figure 3
Supplementary Figure 3
Supplementary Figure 3A
Stain: DCD179
Aggregation categories:
low	<10 puncta in anterior bulb
medium	between 10< puncta <100 in anterior bulb
high	>100 puncta in anterior bulb
days	Low	Medium	High
2	71	54	5
4	18	57	57
7	0	28	84
Fisher's exact test
Comparing low + medium versus high aggregation levels
day 4 versus day 2	< 0.00001
day 7 versus day 2	< 0.00001
Supplementary Figure 3B
Strain: DCD146
Aggregation categories:
low	<10 puncta in anterior or posterior bulb
medium	>10 puncta in either bulbs
high	>10 puncta in both bulbs
days	Low	Medium	High
1	24	128
4		72	54
7		33	81
Fisher's exact test
Comparing low + medium versus high aggregation levels
day 4 versus day 1	< 0.00001
day 7 versus day 1	< 0.00001
Supplementary Figure 3E
	Pharyngeal RHO-1::Venus			Pharyngeal Venus
time (s)	Mean RFI (%)	SD	N	Mean RFI (%)	SD	N
0	100	0	6	100	0	6
6	18.7833	6.49161	6	100.505	4.33846	6
11	20.0739	5.898	6	100.778	3.35532	6
16	21.3166	5.8172	6	101.364	3.71592	6
21	22.0285	5.99438	6	101.007	3.45582	6
81	26.2498	3.99404	6	102.143	5.03728	6
141	28.4779	4.56259	6	103.56	5.98912	6
201	29.4039	5.45413	6
261	30.114	5.15161	6

## Sheet: Supplementary Figure 4
Supplementary Figure 4
Supplementary Figure 4B
Fluorescence lifetimes of worms with tagRFP and RHO-1::tagRFP
	REPEAT 1							REPEAT 2 (independent biological repeat)
	Control		RHO-1					Control		RHO-1
day12	1	1909.24	1	1820.15			day12	1	1987.84	1	1789.59
	2	1942.85	2	1837.84				2	1916.71	2	1863.31
	3	1993.58	3	1852.1				3	2008.28	3	1911.51
	4	2093.98	4	1837.28				4	1904.06	4	1889.36
	5	2052.61	5	1853.36				5	2040.49	5	1934.33
	6	2058.84	6	1899.79				6	2100.23	6	1906.25
	7	2119.29	7	1911.06				7	2059.86	7	1898.81
	8	2034.34	8	1866.67						8	1880.31

## Sheet: Figure 3
Figure 3
A. Pumping analysis with pharyngeal KIN19::tagRFP low aggregation vs high aggregation	Repeat 1* (Day 7)
	low aggregation	high aggregation
	Mean Frequency (Hz)
	3.27934	1.39667
	3.01066	2.92901
	3.4202	0
	2.40063	3.2329
	2.90244	2.48361
	2.88032	1.45038
	2.12995	1.44211
	0.936239	1.87085
	2.75214	2.92032
	2.96894	0
	2.67048	2.63572
	2.63655	2.97767
	2.4292	2.3872
	4.29448	2.14562
	2.2549	2.4255
	2.09274	2.26391
	3.83083	2.21402
	2.56979	1.84902
	4.29094	2.44043
	2.52761	1.06601
	2.5958	0
	0.81515	0
	3.27721	0.0247934
		1.71311
		1.9339
		0
		0
		0.40201
Average	2.73767	1.57874
SD	0.821791	1.08476
SE	0.171355	0.205
Ttest		9.53397e-05
N	23	28
B. Thrashing analysis with body-wall muscle KIN-19::tagRFP low aggregation vs high aggregation	Repeat 1* (Day4)
	low aggregation	high aggregation
	BBPS
	0.958273	0
	0.538182	0.870588
	1.28077	0.183333
	0.767925	0.0503401
	1.32143	0
	1.37037	0.657778
	0.85	0.583333
	0.910769	0.172093
	0.371859	1.08333
	1.0963	0.389474
	0.316667	0.274074
	1.37429	0
	1.37966	0.598529
	0.925	1.13333
	1.48	0.860465
	0.89697	1.05714
	1.42308	0.822222
	0.403636	0.352381
	1.0872	0.607729
	0.925	1.20465
	1.0015	0.74
	0	0
	0.328889	0.756818
	1.40952	1.34545
	0	0.74
	1.6087	0.45679
	1.16842	0.569231
	1.72667	0.845714
	1.26857	1.31139
	0.406098	0.888
	0.4	0.23871
	1.23333	0.569231
	0.778947	0
	0.683077	0.681579
	0	1.11
	0.482609	0.496644
	1.05714	0.0278195
	0.72549	0.882119
	0.274074	0.510345
	0.704762	0.954839
	1.0963	1.00909
	0.711538	1.28696
	0.795041	1.16198
	0	0.826214
	0.302041	0.145098
	0.185	0.555
	1.184	0
	0.704762	1.07636
	1.28077	0.672727
	0.74	0
	0.938028	0.348235
	1.35314	0.37
	1.35918	0.778947
	0	0.352381
	1.16404	1.13846
	0.746219	0.197333
	0.336364	1.0234
	0.0544118	0.569231
	0.321739	0
	1.05714	0.879208
	0	0.205556
	0.360976	1.13846
	1.23333	0.672727
	0	0
	1.48	0.569231
	0.217647	0.34023
	0.296	0
	0.721951	1.05714
	0.616667	0.194737
	1.23333	0
	0.986667	0.996154
	0.625352	0
	0.493333	0.448485
	1	0.965217
	0.17619	0.634286
	0.892462	0.845714
	0.422857	0.870588
	0.845714	0
	0.822222	0.569231
	0.403636	1.64074
	0.592	0
	1.05714	0.833335
	0.986667	1.08579
	0.941818	0.738335
	0.74	0.566668
	0.360976	0
	1.02069	0
	1.01569	0
	0.422857	1.33334
	0.639506	0.830627
	0.704762	0.766668
	0.352381	0
	1.32143	0.905238
	1.51964	0.273457
	0.652941	0.839017
	1.17834	1.18134
	0.572903	0.763795
	0.580392	1.15643
	1.0137	0.540245
	0.4	0.42802
	0.934737	0.546915
	0.977359	1.38438
	1.27586	1.05476
	0	0.615279
	1.13846	0
	1.13846	0.388597
	0	0.557234
	0.888	1.12437
	0.870588	0.254598
	0.704762	0
	1.11	0.763795
	0	1.1075
	0.765517	1.19086
	1.32143	0.922919
	0.643478	0.471278
	0.448485	0.557234
	0.822222	1.18134
	1.15625	0.500566
	0.512871	1.04236
	0.792857	0.984447
	0.698113	0.210953
	0.379487	0.848087
	0.755102	0.546915
	0.37	0.922919
	0	1.11869
	1.0963	0
	1.12121	0.738335
	0.281013	1.18753
	1.184	1.28406
	0.69375	0.527382
	1.27586	0.856996
	0.944681	1.00682
	1.34545	0.738335
	0.870588	0.295334
	0	0
	0.704762	1.67803
	0.314894	0.278617
	1.23333	0.856041
	0.516279	0.471278
	0.344186	0.182305
	1.05714	0.703176
	0.352381	0.321015
	0.965217	0.546915
	1.43226	0.671214
	0	1.05476
	1.67097	1.47667
	0.352381	0.128779
	0.958273	1.05476
	0.538182	0
	1.28077	1.58215
	0.767925	0.820372
	1.32143	1.05476
	1.37037	0.223738
	0.85	0.254598
	0.910769	1.32522
	0.371859	0
	1.0963	1.05476
	0.316667	0.234392
	1.37429	0.371823
	1.37966	0.984447
	0.925	0
	1.48	0.87897
	0.89697	1.18134
	1.42308	0
	0.403636	0.582896
	1.0872	1.0134
	0.925	0.868629
	1.0015	0.615279
	0	1.23056
	0.328889	0.217157
	1.40952	1.23056
	0	0.615279
	1.6087	0
	1.16842	1.47667
	1.72667	0
	1.26857	0.659228
	0.406098	1.09965
	0.4	0.540245
	1.23333	1.41987
	0.778947	0.369167
	0.683077	0.447476
	0	0
	0.482609	1.23056
	1.05714	0.335607
	0.72549	0.594063
	0.274074	0.283975
	0.704762	0.116667
	1.0963	0.671214
	0.711538	0.447476
	0.795041	0.186135
	0	0.590668
	0.302041	0.401269
	0.185	0.535025
	1.184	0.500001
	0.704762	0.975159
	1.28077	1.5964
	0.74	1.05476
	0.938028	1.05476
	1.35314	1.52759
	1.35918	0
	0	1.52355
	1.16404	0.56795
	0.746219	0
	0.336364	0
	0.0544118	0
	0.321739	0.791073
	1.05714	1.772
	0	0.984447
	0.360976	1.58215
	1.23333	0
	0	0.351588
	1.48	0.886002
	0.217647	0.671214
	0.296	0.56795
	0.721951	0.851925
	0.616667	0.541446
	1.23333	1.1359
	0.986667	1.1359
	0.625352	0.582896
	0.493333	0.984447
	1	0.922919
	0.17619	1.1359
	0.892462	0
	0.422857	0.671214
	0.845714	1.89858
	0.822222	0
	0.403636	0.351588
	0.592	1.30294
	1.05714	0.851925
	0.986667	0.606851
	0.941818	1.50681
	0.74	1.58215
	0.360976	0
	1.02069	0.557234
	1.01569	0.922919
	0.422857	0.963046
	0.639506	1.30294
	0.704762	0.217157
	0.352381	0.738335
	1.32143	0.314185
	1.51964	0.513624
	0.652941	0.410186
	1.17834	0.671214
	0.572903	0
	0.580392	0.671214
	1.0137	0.703176
	0.4	0.95269
	0.934737	1.23056
	0.977359	0.64203
	1.27586	0.647662
	0	1.772
	1.13846	1.09383
	1.13846	0.886002
	0	0
	0.888	0.492223
	0.870588	0.461459
	0.704762	1.62434
	1.11	1.60508
	0	0.753403
	0.765517	0.791073
	1.32143	0.273457
	0.643478	0
	0.448485	1.18134
	0.822222	0
	1.15625	0.238173
	0.512871	1.31846
	0.792857	0.167803
	0.698113	0.348271
	0.379487	0.283975
	0.755102	1.75794
	0.37	0.64203
	0	0.210953
	1.0963	0.922919
	1.12121	0.738335
	0.281013	0
	1.184	0
	0.69375	0.30764
	1.27586	0.671214
	0.944681	2.18766
	1.34545	0.273457
	0.870588	1.47667
	0	0.515117
	0.704762	1.07394
	0.314894	0.963046
	1.23333	1.09383
	0.516279	1.01839
	0.344186	0
	1.05714	0.223738
	0.352381	0.527382
	0.965217	0.615279
	1.43226	1.05476
	0	0
	1.67097	0.59865
	0.352381	0.343412
	0.418868	0
	0.293069	0.30764
	0	0.223738
	0.569231	0
	0.457732	0.273457
	1.36316	0.886002
	1.01667	0
	0.0621849	0.37
	1.07419	0.965217
	0.789888	1.02069
	0.912329	0.422857
	0.368159	0.15102
	1.05714	0
	0.521992	0.336364
	0.2	0.4625
	0.983333	0.435294
	1.85	0.716129
	0.972571	0.75
	1.18929	0
	1.30588	0.4625
	0.882569	1.34545
	1.23333	0
	1.75054	0.40155
	0.830244	0.321739
	0	1.00909
	0.840909	0.634286
	0	0.32375
	2.15833	0.660714
	0.735256	0.0778947
	1.184	0.880952
	0.23871	0.986667
	0.389474	0.37
	0.700592	0
	1.31042	0.435294
	2.01818	0.977359
	1.00909	0
	0.792857	0.352381
	0	1.28267
	1.04866	0.296
	1.79394	1.32143
	1.79394	0.643478
	0	0.616667
	0.792857	0.592
	1.23333	0.643478
	1.12121	0.127586
	0	0.127586
	0.074	0.246667
	0.737764	0.548148
	1.19355	0.352381
	0.389474	0
	1.05714	0.125424
	0.152055	0.521127
	1.93043	0.954839
	1.64444	0
	0.853846	0
	0.336364	0.965217
	0.635583	0.352381
	0.584211	0.576623
	0	1.93043
	0	1.02778
	1.2507	0
	1.85	0.119355
	0.980723	0.336364
	1.05714	0.164444
	0.528571	0.274074
	0.528571	0.217647
	1.16434	1.23333
	1.93043	0.652941
	1.01569	0
	0.672727	0
	0.769307	0
	0.123333	0.809375
	0	0.704762
	1.89744	0
	0.4	1.32143
	0	0.672727
	0.721951	0.336364
	1.43889	0.134545
	1.34545	0
	1.32143	0.870588
	0.269091	0.698113
	0.915464	0.252991
	0	1.6
	0.835484	0.973684
	0	1.11
	0.954839	0.643478
	0	1.23333
	1.48	1.05714
	1.332	0
	1.10709	0.822222
	0.0831461	0.704762
	1.30588	0.853846
	1.628	1.0963
	0.709589	0.683077
	0.616667	0.493333
	0.569231	1.00909
	2.0913	0
	0	1.19355
	0.477419	0.704762
	0.616667	0.284615
	0	0.888
	1.14524	0.336364
	0.925	0
	0	0.74
	1.7619	0.321739
	1.92603	0.434315
	0.189744	0
	1.68182	1.67803
	0.189744	0.723858
	1.21644	0.289543
	1.05714	0.121039
	0.501695	0.0500001
	0.8	0.238173
	0.888	0
	0.765517	0.30764
	0.108824	1.23056
	0	0.733335
	0.555	0
	2.01818	0.346095
	0.548148	1.15365
	0.308333	1.05476
	0	0.738335
	1.11	0.707992
	0.704762	1.1075
	0.341538	0
	1.04063	0.321015
	0.727869	0.303425
	1.05714	1.772
	1.23333	0
	0	0.749035
	0	1.09383
	0.643478	0.984447
	1.37674	0.283975
	0.379487	0
	0	0.835851
	1.23333	0.542893
	0.8	0
	0.765517	0
	1.05714	0
	0.528571	0.763795
	1.5382	0.531601
	0.515117	0.351588
	1.07747	0.11359
	0.883335	1.65299
	0.765347	0.242077
	0.841141	1.84584
	1.24789	0.250283
	0.805456	0
	0.561777	0.540245
	0.542893	0
	0.504844	0
	0	0.686823
	1.47667	1.92609
	0.974192	0.922919
	1.18661	0
	1.00113	0.205093
	0.23073	0.351588
	0.868629	1.1359
	0.738335	0.355824
	0.656298	0.110199
	0.862541	0
	1.05476	0.283975
	0.223738	0.689113
	1.00682	0.136729
	0	0.30764
	0	1.08204
	0	0
	1.7359	0.511717
	1.00969	2.55577
	1.64074	0.194299
	1.53374	0.388597
	0.45436	0
	0.343412	1.47667
	0.550623	0.720327
	0	0.671214
	0.651472	0.50341
	0.922919	0.509197
	0.0848661	1.5382
	0.351588	0.30764
	1.31846	0
	0.450204	0.769099
	0.683644	0.295334
	0.769099	0
	1.28406	1.47667
	1.2709	0.638067
	0.106388	1.00113
	0.316429	0.476345
	0	1.88203
	0.369167	0
	1.5093	0
	1.02231	1.64074
	0.91704	0.922919
	0	0
	0.636496	0.527382
	0	0.19955
	0	0
	0.445096	0.283975
	1.02547	0.615279
	0.509197	1.28406
	0.171706	0.647662
	0	0
	0.476345	1.36729
	0.64203	0.783335
	0.443001	0
	1.23056	0
	0.452042	0
	1.00682	0.194299
	1.1075	0.158215
	1.25674	0.62837
	0.62837	0.733335
	0.958877	1.28406
	1.08579	0
	0.330598	1.03023
	0	0
	1.28406	0.392731
	1.25196	0.209457
	0.492223	0
	0	1.1075
	0	2.01364
	1.29029	0
	0.266868	0
	1.74869	1.41987
	0.765681	0.659681
	1.18134	0
	1.05476	0.832709
	0.771395	0.277868
	0.608936	0.50341
	0.994648	0.625708
	0	0.453364
	0	0
	0.615279	0
	1.5382	0.738335
	0.897975	1.11869
	1.02547	0
	0.492223	0
	1.32522	0.671214
	0.369167	1.47667
	0.273457	0.136729
	1.20544	0.922919
	0.588528	0.273457
	1.1075	0
	1.00682	1.1075
	0	0
	1.55439	0.283975
	0.826935	2.36267
	1.19901	0.51813
	1.1075	1.1075
	0.369167	0.839017
	0	1.23056
	0.410186	0
	0.851925	0.175794
	0	0
	1.31846	0.188511
	0	0
	1.86705	1.64074
	1.16579	0
	0.805456	0
	1.14266	0.110199
	0.0946583	0
	0.692189	0
	0.550996	0.427136
	0	0.546915
	0.605193	0.802538
	0	1.84584
	0.963046	0.410186
	0.321015	0
	1.00682	0
	1.84584	0.335607
	1.34243	2.23738
	0.886002	1.00682
	0.265588	0.64203
	0.616668	0
	0.600001	1.31846
	0	0
	0.7982	0
	0	0.254598
	0.468784	0
	1.05476	1.19086
	0.377022	2.03679
	0.788513	0
	0.254598	0.369167
	0.133334	0.217157
	1.15231	0.608041
	0	0.117196
	1.05476	0
	0	0
	1.07394	0
	0.738335	0.615279
	0.963046	1.41987
	1.05476	0
	0.48758	0.671214
	0.714518	0.321015
	0	0.64203
	0
	0.258159
	0.868629
	1.41987
	0.984447
	1.26901
	0.820372
	0.273457
	0.602722
	0.167803
	1.15365
	0.421906
	1.26572
	0.671214
	0.481523
	0.517305
	0.590668
	0.99775
	1.17196
	1.18134
	0.59865
	0.922919
	0.662608
	1.36009
	1.23056
	0.509197
	0.99775
	0.696542
	0.481523
	0.581366
	1.36729
	0.224711
	1.05476
	0.509197
	1.05476
	0.560761
	0.484154
	0.557234
	0.922919
	1.25674
	1.08579
	1.29209
	1.23056
	0.425962
	0.993912
	0.509197
	0.971493
	0.527382
	0.738335
	0.56795
	0.851925
	1.03367
	0.678063
	0.295334
	1.1359
	0.56795
	0.87723
	0.42802
	1.1359
	0.479438
	0.335607
	0.56795
	0.295334
	1.03367
	0.615279
	1.39107
	1.38438
	0.671214
	1.35434
	0.742704
	0.692189
	0.410186
	0.671214
	0.651472
	0.56795
	1.00682
	0.369167
	0.56795
	1.34243
	0.777195
	0.875991
	1.06427
	0.738335
	0.703176
	0.546915
	0.791073
	0.393779
	0
	0.95269
	0.963046
	1.05476
	0.785463
	0.250283
	1.08049
	0.858529
	0.553751
	1.23056
	0
	0
	0
	0
	1.47667
	1.04597
	0
	0.910276
	0.251705
	0.527382
	0.831927
	0.886002
	0.862989
	0.707992
	0.360163
	0.180082
	0.900409
	0.0703176
	0.615279
	1.23334
	1.26901
	1.1359
	0.954744
	0
	0.0785463
	1.47667
	1.1075
	1.17462
	0.421906
	0.991793
	0.546915
	0.263691
	0.17899
	0.62837
	1.19086
	0.963046
	1.5382
	1.28406
	0.734256
	0.922919
	1.23056
	0.544673
	1.50681
	1.61511
	0.369167
	0.833604
	0.671214
	0.283975
	1.14266
	1.01839
	0.659228
	0.539233
	0.410186
	0.546915
	1.34243
	0
	0.3991
	0.295334
	1.00682
	1.01839
	0.963046
	0.692189
	1.2709
	0.68229
	1.1973
	0.960436
	0.273457
	0.680045
	0.23073
	0.23073
	0
	0.922919
	0.991793
	0.546915
	1.40635
	0.538369
	1.71706
	1.36009
	1.772
	1.34243
	0
	1.05476
	1.25142
	0.0811357
	0.44478
	1.40635
	1.03023
	0.835851
	0
	1.08579
	1.23056
	0.989157
	0.738335
	0.936425
	1.43565
	1.23056
	1.05476
	0.904084
	1.1075
	1.54535
	0.738335
	0.458852
	0
	0.989521
	1.00682
	1.38438
	0
	1.47667
	1.02682
	0.684549
	1.23056
	1.05476
	0.590668
	1.26572
	0.160508
	1.25674
	0
	0.314185
	0.714518
	1.36729
	0.906727
	1.20934
	1.18134
	0.615279
	0.50341
	0.963046
	0.963046
	1.05476
	1.07178
	1.28406
	0.590668
	0.363116
	0.246112
	1.21039
	1.1359
	1.08579
	0.820372
	0.527382
	1.60508
	0.238173
	1.05476
	1.12355
	0.802538
	1.51453
	0.410186
	0.763795
	0.763795
	1.1359
	0
	0.64203
	1.1075
Average	0.771032	0.602455
SD	0.468569	0.505422
SE	0.0162155	0.020861
N	38	28
Mann-Whitney test	p < 0.0001
C. Pumping analysis with wild-type (N2) vs pharyngeal RHO-1::tagRFP	Repeat 1* (Day 2)
	N2	RHO-1::tagRFP
	Mean Frequency (Hz)
	5.00891	3.36921
	4.39186	1.01299
	4.72878	2.41094
	4.83844	2.38115
	4.31113	1.64043
	4.77291	1.59834
	4.93786	2.22314
	4.55298	3.17012
	4.12738	5.21955
	4.71311	1.57042
	3.86589	1.78329
	4.6937	2.11697
	4.26678	2.23422
	3.61376	2.42022
	4.51346	1.45695
	3.31258	1.97848
	3.69965	2.01639
	3.12474	3.97098
	3.95522	1.40133
	3.66805	1.90278
	4.52361	3.2242
	4.52549	2.41622
	4.46628	1.78177
	3.94366	3.16773
	3.9768	2.3193
	2.87495	0.464231
		4.36765
Average	4.208	2.2789
SD	0.559754	0.956442
SE	0.109777	0.184067
ttest	5.24352e-10
N	26	27
D. Thrashing analysis with body-wall muscle YFP vs RHO-1::Venus	Repeat 1* (Day 4)
	YFP	RHO-1::venus
	BBPS
	1.67514	1.55106
	1.94396	0
	1.50333	1.35
	2.01666	0.695986
	1.63405	1.28857
	1.70833	1.31541
	0.777585	0.733332
	0.556789	1.15971
	1.08574	1.85
	0	1.18886
	1.5	1.67401
	0.949472	1.56387
	0	1.54705
	1.41442	0.357936
	0.899998	0
	1.87916	0.835183
	0.442156	0.867306
	0	1.10772
	0	1.59444
	0.653622	0
	1.63729	0.971253
	1.42557	0.911109
	0	1.59444
	1.56597	1.50872
	0.715871	0
	1.04662	0.683332
	1.87916	1.87916
	1.66352	1.53591
	1.45484	0.313194
	1.87916	1.88716
	0	1.87916
	1.73461	0.50111
	0	0.259195
	1.69731	1.70188
	1.39845	0.334645
	1.17281	1.07381
	0	1.46157
	0.300666	1.49454
	0.715871	0.300666
	0.452129	0.028258
	0	0.556789
	1.56006	0.715871
	1.70833	1.64
	1.25277	1.45109
	1.30096	1.77666
	1.30096	1.09333
	1.45322	1.50333
	0.242473	0.289102
	0.578204	0
	1.025	1.16237
	2.12008	1.87916
	0.690305	1.81436
	1.90614	0
	1.25277	0
	1.21892	0.872098
	1.20266	1.63771
	0.250555	0
	0.289102	0
	0.429523	1.35717
	0.683332	0.300666
	2.05	0.170833
	0	1.14177
	1.71521	1.87916
	1.57607	1.51596
	0.556789	1.75388
	1.50333	1.12318
	1.50333	0
	1.61071	1.15641
	0.442156	0
	1.89894	0
	1.80224	0
	1.11358	1.55303
	0.911109	0
	0	1.62861
	0.234895	1.74806
	1.63405	0.268452
	1.03678	1.69493
	1.00833	0.391492
	1.63405	1.00222
	2.0115	0.102968
	1.36666	0.292857
	1.07381	1.12189
	1.06368	1.32049
	1.36666	0.484945
	1.71809	1.07381
	1.36666	1.39197
	0.227777	1.45484
	1.07381	1.72257
	1.43936	1.31541
	2.02371	1.31541
	1.68741	1.21892
	1.28574	1.01576
	0	1.11358
	0.357936	1.39197
	1.17448	1.59444
	1.45484	0.911109
	1.63897	1.46408
	1.70833	1.31595
	1.89741	1.57957
	1.20496	1.80376
	0	1.64461
	0.835183	1.18034
	0	1.13
	0	1.68334
	0	0.15
	0.884312	1.1861
	0	1.50667
	1.25277	0.847216
	1.00222	1.10038
	1.51976	1.50667
	0.715871	0.634387
	0	0.753335
	1.00222	1.50667
	0.884312	0.961704
	0.963673	1.40276
	0.357936	1.26877
	1.96865	1.63334
	1.73461	1.29769
	0.259195	1.23334
	0.901998	1.74881
	1.50333	1.21667
	1.025	1.88334
	1.87916	0.259771
	1.09618	1.46822
	1.87916	1.15898
	0.183333	0.244987
	1.25277	0
	0	1.8503
	1.22868	1.86469
	1.67637	0.860954
	0.390475	0.327537
	1.32647	1.59359
	0.313194	1.15898
	0.313194	0.655074
	0.285442	0.353126
	0.536904	0
	1.56597	1.31015
	1.78026	0
	1.34627	1.53295
	0.183333	0
	1.52994	1.10489
	1.87916	0.726106
	0.770938	1.89352
	1.52994	0.93582
	0.854165	0.734961
	1.70833	0
	0	1.73846
	1.30724	0.779312
	1.63405	0
	1.56597	0
	1.07381	1.33198
	0.484945	0.376667
	1.42207	1.23967
	2.12008	0
	1.50333	0
	1.08675	1.695
	1.23692	1.13
	1.46666	1.57957
	0.115641	1.73846
	1.01921	0.83423
	1.804	1.38772
	0	1.76803
	0	1.29885
	1.36666	1.79365
	1.70833	1.00214
	0	1.90403
	1.69731	1.82448
	1.67037	1.69925
	1.61071	1.89689
	0.349612	1.50667
	1.46157	1.50667
	1.67037	0.029199
	1.07381	1.25556
	0.644284	0.31389
	1.56597	0
	0	0
	1.81436	1.01802
	1.20266	1.30122
	1.30724	1.45807
	0.980433	0.655074
	1.87916	0.579488
	1.1275	0
	1.1275	0
	1.58597	1.50667
	0.900002	0
	1.31535	1.07619
	0	0.610812
	1.66603	0.753335
	1.73846	1.62257
	0	0.549307
	1.45707	1.46331
	1.87178	1.7343
	0.376667	1.61429
	0	1.34926
	2.08334	1.79071
	0.655074	1.50667
	0.479395	0.592511
	0.259771	0.677155
	0.68485	0.68485
	1.58107	1.02727
	1.96073	0.627779
	0.941669	0
	1.61429	0
	1.34316	1.43492
	1.88334	0.784724
	1.90498	0.784724
	2.08064	1.28618
	1.56945	1.695
	1.81839	0.579488
	0	0.792984
	0.664707	1.58597
	1.88334	0
	0.243011	1.71212
	0	0.68485
	1.23391	0.777585
	1.50667	1.48333
	1.13	0.129597
	0.376667	1.11666
	0.279013	1.60191
	0.551221	1.63729
	1.45221	1.17267
	0	0
	0	1.44551
	1.44256	0
	0.655074	1.57325
	1.65792	1.44551
	1.86218	0
	1.34926	1.51441
	1.21506	1.7869
	0	1.10336
	1.50667	1.64119
	0.620394	0
	0.68485	1.56597
	0.941669	0
	1.17709	1.73795
	0.179365	1.40571
	0	1.59048
	1.60547	1.16095
	0.342425	1.63012
	1.13	1.97287
	0.941669	1.79502
	0	1.82222
	0.859971	0.45281
	1.31834	1.33983
	1.38368	1.64
	0.376667	1.79746
	0.717462	0.238624
	0.198246	0.375833
	1.75778	0
	1.58761	0
	1.78421	1.29597
	0	1.91915
	0.570708	0.704686
	0.579488	0.357936
	1.79365	0
	1.43492	0
	0	1.36291
	1.27106	0
	1.45807	0.259195
	0.538096	1.58245
	0	1.63405
	1.64792	0
	1.35214	0.341666
	1.54091	1.57014
	0.259771	1.68136
	1.68298	0
	1.20534	1.96087
	0.502223	1.62522
	0.376667	1.68136
	2.10934	1.61608
	1.8478	1.13398
	1.74686	1.83918
	0.203604	1.61071
	0.342425	1.78968
	0	1.10539
	1.48948	0
	1.61429	1.40937
	0.301334	0.313194
	0	1.13154
	0.243011	1.69731
	1.25556	1.83333
	1.50667	0.227777
	1.58439	1.78026
	0.269048	1.64427
	0.922451	1.18684
	1.73846	1.56597
	0.784724	1.56597
	0.638419	0.187916
	0.856062	0.097619
	0.083704	1.73461
	1.43492	1.44551
	0	0
	1.25556	0
	1.79773	0.89751
	1.42139	1.51455
	0.717462	1.10539
	0.480852	1.54755
	1.67408	0
	1.60129	0.070912
	0.171212	1.69294
	1.58597	1.55106
	0.436716	1.3336
	1.73846	1.07381
	1.44872	1.22721
	0	1.87916
	1.03197	1.46877
	0.235417	1.81436
	1.15898	1.46428
	1.54852	1.65952
	1.93715	0
	1.47713	0
	1.00445	1.1275
	1.31834	1.25277
	1.10956	0.417592
	1.88334	1.64427
	1.64792	1.40937
	0.782686	0
	1.92927	1.804
	1.0463	1.63405
	0	1.63405
	0.669631	1.03908
	1.65366	1.66253
	0	1.56945
	1.95748	1.25556
	1.79365	1.21667
	0.864483	1.41975
	1.11148	1.53564
	1.34524	1.2
	1.07619	0.925887
	2.2321	1.13837
	1.82627	1.65913
	0.31389	1.3697
	0.279013	1.20534
	0.602668	1.52116
	1.68851	1.58107
	1.91526	1.59605
	0	0
	0	0.66082
	1.47561	0
	1.08729	1.29451
	0.405019	0
	1.74456	0.729034
	1.11018	0.579488
	1.44256	1.32066
	1.12199	0
	0	0
	0.68485	1.47347
	0.606132	0.83144
	1.83505	0.538096
	1.83505	0.627779
	1.46754	1.29143
	1.71212	0
	0	0.350388
	1.27487	0.434616
	1.14142	0.941669
	1.59359	0.904002
	0.869233	0
	0	1.86803
	1.14142	1.25556
	0.860954	1.40946
	1.28618	1.15898
	0.734961	1.63553
	0.792984	1.43895
	1.75778	1.25147
	1.46482	0.877672
	0	1.26416
	0.982611	0.627779
	0	0.875971
	1.07619	0.416975
	1.07619	1.05467
	1.88334	0
	0.954932	1.35032
	1.09179	1.34524
	1.09035	1.58597
	1.23497	0
	1.25556	0.679701
	0.68485	1.59359
	0.289744	1.43492
	1.17709	0
	0	1.28097
	0.502223	1.79946
	0	1.44872
	0.993409	0.452001
	1.39506	0.453816
	0	1.59359
	1.70108	0.243011
	0.68485	1.77255
	1.54091	0.909197
	1.07619	0.510736
	1.4125	0
	0.31389	1.29479
	1.07619	1.48384
	1.07619	1.808
	0	0.602668
	1.00445	1.92714
	1.8374	1.15898
	0	0
	1.46482	1.11605
	1.43492	1.67408
	1.07619	0
	0.803557	0.657272
	1.53221	1.32942
	0	0
	0.602668	0
	1.23187	1.27324
	0.502223	1.85681
	1.40999	1.695
	1.39506	1.38772
	1.94754	0.729034
	0.753335	0.073856
	1.50667	1.35847
	1.78917	0.941669
	0.645716	1.43492
	0.918701	0.358731
	0	0
	1.10581	1.75778
	1.51424	0.163768
	0.301334	0
	1.28227	0
	1.61429	1.10785
	0.910625	1.77255
	0.486023	1.55098
	1.25924	1.28227
	1.4125	0
	1.82627	1.47392
	1.54091	0
	1.15898	0.602668
	0	1.88334
	0.886276	1.695
	0.724361	0.941669
	1.50667	1.31015
	1.695	0.655074
	1.77537	1.15
	0.645716	1.3
	1.20534	0
	1.75961	1.20534
	1.4538	1.25
	0.837039	0.779312
	0	1.4408
	0.376667	0.904002
	1.98246	0
	0.602668	1.79603
	1.19849	1.43492
	0.482907	1.5453
	1.8478	1.07619
	1.33926	1.13
	0.538096	0.127684
	1.73846	1.35214
	1.56179	1.14346
	0.590851	1.34926
	1.13516	0.147713
	0	1.10785
	0.456567	0.68485
	0.869233	1.98471
	0.579488	1.25556
	0.558026	1.62257
	0.519541	1.3697
	0.982611	1.59295
	1.3697	1.50667
	1.808	1.13
	0	0.672621
	1.50667	1.72191
	0.376667	0.502223
	0.358731	0
	0	1.07619
	0.641136	1.29713
	0	1.48617
	1.94041	1.76803
	0.68485	1.18815
	0.20926	1.09757
	1.3697	0.869233
	1.71212	1.10785
	1.73846	1.00445
	0.301334	0
	1.73267	1.61058
	1.90549	0.68485
	0.627779	0
	1.5453	0.486023
	0.697532	0
	1.82627	1.45328
	0	1.32942
	0.68485	0.347693
	0.753335	0.327537
	1.39506	0
	1.76988	0.627779
	0.837039	0.376667
	0.899504	1.25556
	1.75624	0.84558
	0.852832	0.175194
	1.48748	1.77468
	1.12298	1.62981
	1.63769	1.39506
	0.997795	0
	1.55098	1.4125
	1.50667	1.17323
	0.243011	0.519541
	0	0
	1.01194	0
	0.579488	1.78208
	1.22162	1.8449
	0.358731	1.68343
	1.05116	0.568555
	1.70108	0.645716
	1.54226	0.243011
	1.18948	1.64792
	1.94981	1.30276
	1.13	1.47269
	0.700777	1.50667
	1.12199	1.85888
	0	1.3697
	1.71212	1.3697
	1.02727	0
	1.63769	1.25556
	0.301334	1.67408
	1.44872	1.71551
	1.22636	1.67408
	1.73063	1.67408
	1.36241	1.81839
	0.961704	0.579488
	0.31389	1.62883
	1.53907	0
	1.37706	1.02727
	1.65568	0
	0.139506	1.43492
	1.01573	1.79365
	0.610812	1.50667
	0.607528	1.88334
	1.67408	1.56945
	0.869233	0.486023
	0	0
	0.856062	1.61429
	0	1.88334
	0.358731
	1.29143
	0.982611
	1.61429
	1.75778
	1.50667
	0
	0.837039
	0
	0
	0.655074
	1.54815
	1.63405
	0
	1.31243
	1.1275
	1.73461
	0
	1.78333
	1.32258
	1.87916
	0.150333
	0
	0.221078
	1.73186
	1.38174
	0.695986
	0.313194
	1.20266
	1.15641
	0.208796
	0.812611
	1.87916
	0.618459
	1.30724
	0.699223
	0.536904
	1.79746
	0
	1.79502
	1.1275
	1.78968
	1.25277
	1.30724
	0.326811
	0
	0
	1.50333
	0.751665
	1.45484
	0.136666
	0.334073
	1.804
	1.58245
	1.19797
	1.7587
	0.638206
	1.57463
	1.39197
	0
	0
	1.82837
	0
	0.183333
	0.565162
	1.3591
	0.954495
	1.23224
	1.67925
	1.50333
	0.683332
	1.76527
	1.26685
	0.923097
	0.341666
	1.32647
	1.76862
	0
	0.911109
	1.96087
	1.26904
	0.326811
	0.900612
	0.742385
	1.77359
	0
	0.536904
	0
	0
	0.077893
	0.626388
	0.782984
	0.375833
	0.183333
	2.09767
	1.79176
	0
	1.74494
	0.341666
	0
	1.50333
	0.136666
	0.362248
	0.663234
	0.112189
	0.805355
	0.492895
	0.259195
	0
	0
	0.907182
	1.31871
	0.644284
	0
	2.18225
	1.52881
	0.289102
	1.51778
	0.916665
	1.1275
	0
	1.95433
	1.63012
	1.14177
	1.46428
	1.36666
	1.36666
	0.989033
	0.589541
	0.289102
	1.85193
	0.442156
	0
	1.1275
	1.62861
	1.62861
	0.313194
	1.36666
	0.578204
	0.313194
	0.341666
	1.70833
	1.40937
	0.859046
	0.214761
	0.980433
	0.549999
	0.770938
	1.82837
	1.25277
	0.626388
	0.326811
	0
	0.980433
	0.326811
	0.259195
	0
	1.11358
	0.835183
	0.867306
	0.341666
	1.01667
	1.55
	1.6392
	1.52961
	1.56945
	1.25556
	1.42139
	0.875971
	1.92714
	1.12199
	1.75194
	1.79147
	0
	1.84327
	1.60547
	0.376667
	1.58334
	0
	0.734961
	1.48197
	1.63143
	1.46992
	1.45
	1.60547
	0.882284
	0.31389
	0.327537
	0.807145
	1.29143
	0.519541
	1.13516
	1.55421
	0
	0.418519
	1.64792
	1.25556
	1.72191
	1.3697
	1.90236
	0.724361
	1.69116
	1.40912
	0.386326
	0.869233
	1.43492
	0
	1.64521
	1.60224
	0
	0
	1.62153
	0.228283
	1.77013
	0.186009
	0.20926
	0.99123
	0.127684
	0
	0
	1.07619
	1.56945
	0
	0.342425
	1.99412
	1.68851
	0.66082
	1.03399
	0.456567
	0.860954
	0.486023
	1.25556
	0
	1.27684
	0.084644
	1.64188
	1.44872
	0.997061
	1.04308
	1.4125
	1.22417
	1.84149
	0.877672
	1.74456
	0
	1.34807
	1.59037
	1.39506
	0.734961
	1.20534
	0.579488
	0.403572
	2.00889
	1.51272
	0.358731
	0
	0.558026
	0.909197
	0.353126
	0.221569
	0.259771
	1.48684
	1.94828
	0
	0
	0.641136
	0
	1.15898
	0
	1.07619
	1.9775
	0
	0.186009
	0
	1.07619
	1.3697
	0.710693
	0.753335
	0.344382
	0.745057
	1.24176
	1.48807
	1.02305
	1.09576
	0.215239
	1.81526
	1.7245
	1.09355
	0.54788
	0
	1.47392
	0.510736
	0.239154
	1.03908
	1.16714
	0.502223
	0.114142
	1.78061
	1.02727
	0.717462
	1.6822
	1.90162
	0.717462
	1.34926
	1.50667
	0.555089
	0.993409
	1.49011
	0.846444
	0.761799
	0
	0.869233
	0.386326
	2.01597
	1.61429
	1.07619
	0.56219
	1.808
	1.80145
	0.376667
	0.792984
	0.295425
	1.50667
	0.491305
	0
	0.734961
	1.46992
	0.753335
	0.860954
	0.228283
	0.941669
	1.43492
	0.717462
	0.31389
	0
Average	0.986716	1.02214
SD	0.630072	0.631746
SE	0.0213984	0.0273897
Mann-Whitney test	0.2802
N	50	61

## Sheet: Supplementary Figure 7
Supplementary Figure 7
Supplementary Figure 7A
Stain: CF3166
Aggregation categories:
low	<10 puncta in anterior bulb
medium	between 10< puncta <100 in anterior bulb
high	>100 puncta in anterior bulb
days	Low	Medium	High
2	105	18	2
5	18	52	44
8	1	25	68
Fisher's exact test
Comparing low + medium versus high aggregation levels
day 5 versus day 2	< 0.00001
day 8 versus day 2	< 0.00001
Supplementary Figure 7B
Stain: CF3649
Aggregation categories:
low	>15 puncta in head muscle or middle body
medium	>15 puncta in both head and middle body
high	>15 puncta in all regions
days	Low	Medium	High
2	81	52	1
4	61	43	4
7	50	39	12
Fisher's exact test
Comparing low + medium versus high aggregation levels
day 4 versus day 2	0.1754
day 7 versus day 2	0.0002
Supplementary Figure 7C
Stain: DCD13
Aggregation categories:
low	no puncta in isthmus
medium	puncta covering <50% of isthmus
high	puncta covering >50% of in isthmus
days	Low	Medium	High
2	0	19	53
4	0	4	61
7	0	1	40
Fisher's exact test
Comparing low + medium versus high aggregation levels
day 4 versus day 2	0.0024
day 7 versus day 2	0.0008
Supplementary Figure 7D
Stain: DCD127
Aggregation categories:
low	<15 puncta in whole animal
medium	>15 puncta in whole animal
days	Low	Medium
2	144	6
7	144	1
Fisher's exact test
Comparing low versus medium aggregation levels
day 7 versus day 2	0.1209

## Sheet: Supplementary Figure 8
Supplementary Figure 8
A.Thrashing analysis with body-wall muscle KIN-19::tagRFP vs body-wall muscle tagRFP vs Wild-type(N2) Day4	Body-wall muscle tagRFP	Wild-type(N2)	Body-wall muscle KIN-19::tagRFP
	1.87916	2.06339	1.43492
	1.14384	1.33333	0.376667
	0	0.783332	0.31389
	1.41666	1.51666	1.63768
	1.63333	1.36666	1.55098
	1.67037	0.51084	0.587708
	1.26666	0.433332	1.25556
	1.55	1.53252	0.645716
	0.992765	1.21666	0.900002
	1.48333	1.55	0
	1.91666	1.65885	1.25
	1.54598	1.8631	0.22321
	1.50333	1.13624	1.71063
	1.93978	0	0.327537
	0	0.867306	0.31389
	1.84836	1.13561	1.3697
	0.907182	1.44551	1.08005
	1.36666	0.765585	1.3697
	0.777585	1.36666	0.886276
	1.43174	1.21666	0.997061
	1.90295	1.76171	0.123498
	1.78968	1.33333	0.753335
	0.556789	1.6	1.13
	0.939581	0.849708	1.44872
	1.43174	1.18969	0
	1.75623	0.939581	1.25556
	1.61573	1.87916	0.965814
	1.67037	0	0.221569
	1.6262	1.2	1.31015
	0	1.58333	0
	1.62069	1.31666	1.46482
	1.73461	0.916665	0.68485
	0.901998	1.40634	1.09576
	1.61071	0	0.816113
	0.715871	1.34809	1.45027
	1.78968	0.649999	0.826831
	1.58608	0.939581	1.22993
	1.5711	1.61071	0.699819
	1.82837	0.197807	1.75778
	1.59444	1.26596	1.00445
	0.259195	1.18684	0.784724
	1.07381	1.52936	0.68485
	1.61071	1.32987	1.46383
	1.82837	0	1.50667
	1.56006	0.672542	0.203604
	0.751665	0	0.886276
	1.52236	0.901998	0.31389
	1.82222	0.901998	1.58597
	1.30724	1.28857	1.44872
	1.63405	1.19653	1.43492
	1.92286	1.17731	1.28227
	1.55901	1.63012	1.56945
	1.20266	1.23408	1.14142
	1.50333	1.2308	1.3697
	0.751665	0	1.02727
	1.68598	0.375833	1.83244
	1.90422	1.51545	1.25556
	1.89894	0.73267	1.50667
	1.65201	0.183333	0.279013
	1.65201	0.0677176	1.3697
	0.653622	1.03848	0
	1.23408	0.671129	0.717462
	1.39197	2.07603	1.17709
	1.59929	0.980433	0.200889
	1.63405	1.0905	0.46598
	1.63405	0.699223	0.269048
	1.65	0	1.39506
	1.94876	0	1.25556
	1.50333	1.78968	1.53457
	1.50333	0.751665	1.45807
	1.72257	1.7164	1.43492
	1.43333	1.22146	0.807145
	1.23333	0.214761	0.538096
	0.980433	1.27943	1.07619
	1.30724	1.29784	0.366667
	0.59342	0	1.73847
	0.881842	1.6223	0.538096
	1.10795	1.08153	0
	0	0	1.43492
	1.72169	1.43174	0.724361
	1.08333	1.37805	1.39077
	1.6388	0.366666	0
	0	0.341666	0.538096
	1.6	0.683332	0.602668
	1.0195	0.395613	0.941669
	1.34226	1.38895	0.753335
	1.78333	1.38895	1.44389
	1.88333	1.56006	0.324015
	1.64157	1.1275	1.76104
	1.26685	0	1.20534
	1.22598	0	0.301334
	0.802339	2.03153	1.50667
	1.43333	1.87916	0.968574
	1.68333	1.40937	0.376667
	1.51469	0.805355	0.560994
	1.74629	1.07381	0.627779
	1.31666	1.96087	1.43895
	0	0.715871	0
	0.901998	1.4142	1.0367
	1.78968	0.708411	0
	1.48477	1.29479	0.538096
	1.32519	1.48334	0.279013
	1.13889	1.59798	0.152189
	1.75145	0.782686	1.65734
	1.00222	0.896827	1.25556
	1.69731	0	0.396492
	0.805355	1.16667	0.396492
	1.72471	1.33926	1.59155
	1.50333	1.21751	0.358731
	1.07381	0	0.525583
	1.07381	0	1.38111
	1.8374	1.25556	1.43492
	0.136666	1.63768	0.502223
	0.040521	0.67607	0.753335
	1.7442	1.31015	1.13
	0.626388	1.50667	0.376667
	1.72968	1.88334	1.73847
	0.100222	1.88334	1.29885
	1.68477	1.58344	1.49525
	0.549999	1.06175	1.40937
	0	0	0.313194
	1.02078	1.01667	1.47233
	1.25278	1.71212	0.284722
	0.406305	0.966669	0.51084
	0.770938	1.00765	1.26744
	1.35843	0.828476	0.781874
	0.965995	0	0.467543
	0.326811	1.07619	1.37401
	0.224378	1.16667	0.307372
	0.274999	0	0.980433
	1.56597	1.75138	0.326811
	1.56597	1.08334	0.0166666
	1.61071	1.35	1.15
	1.58245	0.406363	0.313194
	1.25278	1.57675	0
	1.54452	1.05117	1.35717
	1.596	0	0.963673
	1.02968	0.916218	0.983331
	0.617807	0.13697	1.16926
	0.313194	1.79191	0.387456
	1.69294	1.4538	1.07381
	0.715871	1.88334	1.50333
	0.653622	1.15898	1.50333
	0.843706	1.43038	1.29597
	0	0.558026	0.3448
	1.21236	1.66239	0.791226
	0.974381	1.36605	1.29597
	0.884312	0	1.57325
	1.28857	0.982611	1.45845
	1.28857	0	0
	0.601332	1.44579	0.89013
	0.300666	0.347693	0.751665
	1.43174	1.83014	0.79722
	1.78968	1.31015	0.626388
	1.40498	1.9427	0.536904
	1.2	1.10086	0.939581
	1.23333	0.766103	0.835183
	1.03241	1.89489	0.51839
	1.2	0.0231084	0.777585
	1.01576	0.235417	0
	0.816665	0	0.414304
	1.57757	0	0.715871
	0.916665	1.30578	1.07381
	1.02078	1.71646	0.484945
	1.29051	0.876726	0.278394
	1.29051	0.0760944	1.15641
	0.316666	1.59037	0.867306
	0	0.395106	1.30724
	1.60058	1.58836	0.869272
	0.999998	1.7827	0.375833
	1.25278	1.50667	1.01186
	1.01186	1.50667	0.867306
	1.08333	0.163768	0.341666
	1.5	1.02727	1.30724
	1.375	1.43853	0.375833
	1.13889	0.796797	1.54755
	1.71111	0	1.05868
	1.63647	1.67408	0.50674
	1.2332	0.433858	1.60077
	1.87384	0.269048	1.54755
	0	1.60284	1.77222
	1.04883	1.3747	0.326811
	0.375833	0.9327	1.25278
	1.451	1.25556	0.683332
	1.47065	1.34807	1.05012
	0.357936	0.706252	0.570885
	1.14728	1.79365	0
	0.773481	1.63768	1.46157
	1.63405	0.655074	0
	1.63405	0	0.939581
	0.341666	1.31015	1.59929
	1.73461	1.63768	0.653622
	1.15641	1.96522	1.50333
	1.41618	0	0.675654
	1.33206	1.65	0.461917
	0.490216	1.35843	1.025
	0	1.76641	1.13889
	0	0.633332	1.50333
	0.715871	1.41666	0.357936
	1.71809	1.32647	1.39197
	1.11116	1.7	1.57064
	1.36666	0.366666	0.939581
	1.40937	1.43936	1.10539
	1.01186	1.76862	1.42207
	0.504473	1.11666	1.67037
	1.81436	1.45149	1.15641
	0.867306	1.13459	0.417592
	0.326811	0	0.751665
	1.59929	0.720775	1.28333
	1.12189	1.65	0.649587
	0.653622	1.03333	0.479786
	0	1.96458	0
	0.50111	2.01666	0.653622
	0.715871	1.32369	0
	0.214761	1.73795	0.683332
	1.57757	1.1275	0.653622
	1.36666	1.4	0.644284
	1.74806	1.28125	0.679215
	1.69731	1.46666	1.36666
	0	0.983331	0.333016
	1.50333	1.37681	0.450999
	1.50333	0	0.901998
	1.25278	0	1.50333
	1.76862	1.2	0.716665
	1.64427	1.63097	0
	0.259195	1.36666	1.36666
	0.313194	1.40937	0.250555
	0	0.357936	0.749998
	1.50333	1.44551	1.48787
	1.1	1.44551	0.203153
	1.45	0.319857	0.357936
	0.683332	1.19803	0
	1.31666	1.29464	0.917932
	1.18333	1.10901	1.43752
	1.23901	0.349612	0.702491
	1.28333	0.867306	0.980433
	1.53333	1.80491	1.22364
	0.711034	1.4149	1.50333
	1.46729	1.16926	0.835183
	1.21892	1.85652	0
	0	0.357936	0.683332
	0.336566	0.442156	0.529342
	1.3	1.20803	1.1195
	0.336566	1.30598	0
	1.06666	1.68327	0.208796
	1.28333	1.71521	0.835183
	1.35	0.339462	1.09333
	1.75985	0.653622	1.05497
	0.783332	1.25278	0.671701
	0	0.980433	0
	1.025	1.35717	0.601332
	1.33107	1.23488	1.1275
	1.73202	1.87916	0.59342
	0.326811	0.563749	1.18119
	0	1.67037	0.536904
	0.683332	1.05233	0.563749
	1.47065	0.751665	1.00222
	0.556789	0.859046	0.238624
	1.43936	0	0.715871
	0.268452	0.835183	1.34914
	0.383014	0	0.812611
	0.883157	1.73461	0
	0	1.56597	1.20266
	1.41457	1.1195	0
	0.175975	1.63405	1.37987
	0.678761	1.36666	0.751665
	1.04981	0.601332	1.36666
	0.939581	2.12008	1.54755
	1.62522	2.03458	0.794012
	0	1.68477	0.683332
	1.92995	1.65	0.369671
	1.50333	2.01666	0.50111
	1.28857	1.81013	1.36666
	1.29192	1.44155	1.03354
	0	0.963673	0.604017
	1.30147	1.33629	1.29597
	1.63405	1.88333	1.55833
	0	0.469791	1.36666
	1.35805	1.3115	1.03678
	1.42122	1.6586	1.07381
	1.93088	0	1.50333
	1.36666	1.9172	0.939581
	0.159929	1.56597	1.30724
	1.10299	1.43174	1.57913
	1.47065	1.0824	0.781732
	1.29597	1.43174	0.835183
	1.34914	0	1.03889
	1.59006	1.8527	0
	1.20897	1.64554	0.167037
	0.455555	0.751665	1.40937
	0.423473	1.78968	0
	0.939581	1.86558	0.751665
	1.80689	0.313194	1.20958
	1.90899	1.18684	1.57325
	0	1.8631	0.920406
	0.805355	1.64096	0.544685
	1.11667	0.129597	1.025
	1.31667	1.43534	1.57607
	1.38334	1.8955	1.43174
	1.54191	0.406305	0.357936
	1.01667	0	1.32647
	1.18334	0	1.33629
	1.66667	1.25278	0.777585
	0.0333334	1.025	1.29597
	0.239154	0.375833	0.980433
	1.44256	0.259195	0.729034
	0.956616	1.50333	0.833335
	0.866669	0.880857	0.755855
	0	1.18119	0
	0.941669	1.53799	0.221569
	1.56945	0	0.374328
	1.68334	1.6319	0.95879
	1.48334	1.80752	0.933335
	1.71667	1.44929	1.43818
	0.533182	1.98356	0
	0.900002	0	0.0166667
	1.23594	1.64515	1.57413
	0	0	1.37935
	1.55	0.751665	1.18334
	0.941669	0.751665	1.15
	1.46667	0	0.643091
	1.71716	0.601332	0.228283
	1.05214	0	1.19849
	1.84149	0.227777	1.32941
	0	0.911109	0
	1.53457	0	0.805706
	1.10785	0	0.332354
	1.3905	1.07381	0.68485
	1.28836	1.56115	0.228283
	1.4756	0.770938	1.50667
	0.602668	0.668147	0.790903
	1.3697	1.37022	1.67408
	1.02727	0.357936	0.891041
	0.655074	1.33629	0
	0.251112	0.208796	1.50667
	1.50667	1.49603	1.39506
	1.14638	0.711034	0.486023
	0.456567	1.67848	1.33926
	1.21506	1.39197	0.717462
	0.579488	1.62522	1.75194
	0.982611	0.221078	1.28618
	1.63768	1.1275	0.837039
	1.14142	0.469791	1.28227
	1.59798	1.65106	0.717462
	0.669631	0.192735	0.327537
	1.52116	1.63405	1.52703
	1.39824	0	0.301334
	0.892841	1.72797	1.78626
	1.74553	0.0514839	1.0294
	1.25556	1.51455	1.71212
	1.3697	1.73893	0
	1.3697	0.626388	0
	1.29776	0.115641	0.941669
	0.791318	1.78968	0.106104
	1.15264	0.572697	1.63768
	0.519541	0	0
	0.31389	0.777585	0.342425
	1.30121	0	0.904002
	1.63459	1.34226	0.827841
	0.31389	1.52236	1.10038
	1.63768	0.666032	0.160284
	0.982611	1.30289	1.43492
		1.31243	1.72191
		0	1.70108
		1.58245	0.68485
		1.05497	1.07619
		0.300666	0.579488
		1.39845	1.18256
		1.22364	1.18948
		1.71809	0
		1.36666	1.67408
		0.341666	1.3697
		1.37566	0.247808
		1.19577	1.15898
		1.72191	1.63768
		1.31667	0.948254
		1.0908	1.64364
		1.24612	0.753335
		1.51695	1.13
		1.54891	1.78421
		0.563241	0.928769
		1.82056	1.29885
		1.695	1.63459
		1.56945	1.4125
		1.44389	1.07619
		0.0833335	0
		0.0500001	1.25556
		0.689026	1.40155
		1.31015	1.50667
		1.36667	1.13
		1.28334	1.31015
		1.48334	1.45807
		1.3	1.07619
		0	0
		1.38334	1.38368
		1.18334	1.50667
		1.64792	1.19849
		0.873432	1.02727
		1.81443	1.58597
		1.67408	0
		0.279013	0.538096
		0.590851	1.2
		1.36406	1.48333
		1.27925	0.183333
		1.07619	1.5375
		1.06696	1.83546
		1.47163	0.205936
		1.63768	1.64427
		0	1.1275
		1.57477	0.751665
		1.05195	1.39197
		0.724361	0.59342
		1.0908	1.17448
		0	0
		1.13	1.34914
		1.07619	0
		1.72191	1.07381
		1.66527	1.57325
		1.28185	0
		1.88334	0.308903
		0.376667	0.683332
		0.228283	0.601332
		1.64188	0.626388
		1.31015	0.751665
		0.655074	0.326811
		1.44535	0.375833
		0.667512	0.639715
		0.34139	1.21798
		1.89615	0.51839
		0.228283	0
		0.753335	0.842989
		1.27186	0.395613
		1.50667	0
		1.86118	1.63405
		1.14477	1.48055
		1.37805	0.683332
		0.502223	0
		1.11823	0.665537
		0.919564	0.294771
		0.794533	1.25278
		1.53593	1.43174
		0.655074	0.805355
		1.69116	1.32647
		1.44256	0
		1.89262	0.609458
		0	0.556789
		0.579488	0
		0.18374	0.980433
		1.64792	1.62522
		1.13246	1.25278
		0	1.20266
		1.16897	1.18684
		1.3697	0.0709118
		0.430477	0.442156
		0.710693	1.50333
		1.70925	1.46157
		1.78421	1.1275
		0.753335	1.50333
		1.56945	0.751665
		0.221569	1.50333
		0.358731	1.5375
		1.07619	0.289102
		0	1.45058
		1.43492	1.73461
		0.729034	1.52159
		0.916218	1.05868
		1.32343	0.889726
		0.407208	1.59537
		0.918701	1.13889
		0.972045	1.78361
		1.71212	0.278394
		1.25556	0.278394
		0	1.00222
		0	0.556789
		1.67408	0.626388
		1.5453	0
		0	1.56597
		0	1.56597
		0.579488	1.15641
			1.78613
			1.52881
			1.68823
			1.57913
			0.45281
			0.715871
			1.00222
			0.0431991
			0.730785
			1.22721
			0.163405
			1.61897
			0.867306
			1.24414
			1.44551
			1.20266
			1.43174
			1.58889
			0.425471
			1.00222
			0.653622
			1.36666
			0.911109
			0.911109
			1.53401
			1.18684
			1.66158
			0.524417
			1.56597
			1.65808
			1.15641
			1.42207
			0.653622
			0.925126
			1.59444
			1.13889
			1.65
			0.578204
			0.805355
			1.69731
			1.36666
Average	1.13084	1.04777	0.914657
SD	0.547474	0.60264	0.519573
SE	0.0287746	0.0275353	0.0227848
Mann-Whitney test	vs KIN-19 p<0,0001	vs tagRFP p=0,07	vs N2 p<0,0001
N	39	42	38
B. Pumping analysis with pharyngeal KIN19::tagRFP vs tagRFP Day 8	tagRFP	KIN-19::tagRFP
	Mean Frequency (Hz)
	3.22153	1.01495
	1.83156	4.49447
	3.05195	2.10098
	0	0.674942
	3.46405	2.45684
	2.5181	0
	3.97447	2.65773
	4.17932	3.56998
	3.88253	4.93866
	3.74126	1.46223
	3.92561	2.81059
	3.06108	3.39468
	3.83083	2.58537
	2.32315	3.47101
	2.98008	2.09276
	3.41365	3.24992
	3.90971	3.44103
	2.95463	2.67728
	1.85113	3.70915
	1.62996	2.92107
	2.32577	1.80315
	3.07814	1.67689
	3.5685	1.98036
	2.42494	3.84052
	4.27457	0.0888889
	0	0
	0	3.49232
	3.5908	3.06452
	1.92569	0.840398
	0
	4.41993
	3.76847
	3.51417
	1.66667
	1.17841
	2.51025
	1.57434
	2.79934
	3.33723
Average	2.7103	2.4314
SD	1.24713	1.31564
SE	0.433996	0.4515
ttest		0.380375
N	39	29
C. Pumping analysis with pharyngeal tagRFP vs N2 Day 3	N2	Pharyngeal tagRFP
	Mean Frequency (Hz)
	4.36214	4.62226
	3.57764	5.38589
	3.67032	3.06261
	3.39813	4.1188
	4.44618	4.50288
	2.8249	1.04651
	4.32455	3.72671
	4.36809	5.36646
	3.25291	0
	3.47659	4.12422
	2.83981	4.18966
	3.9512	4.35323
	3.71113	4.7623
	4.89328	3.11516
	4.048	4.35897
	0	2.28712
	3.84247	4.69974
	3.04173	4.67414
	4.08429	2.60041
	4.20317	1.79794
	4.06479	4.84018
	0	3.75
	3.21959	0
	4.23986	1.6113
	1.20232	3.33747
	3.84584	2.92874
		4.06659
Average	3.41881	3.45664
SD	1.23929	1.50086
SE	0.670483	0.665231
ttest		0.920565
N	26	27
D. Pumping analysis with pharyngeal tagRFP vs N2 Day 7	N2	Pharyngeal tagRFP
	Mean Frequency (Hz)
	0	3.44913
	1.67068	4.69404
	2.7532	4.47687
	0	0
	0	2.89292
	2.70782	2.32616
	3.78356	0
	3.01058	0
	2.2781	0
	0	0
	3.47028	2.05553
	2.78723	2.75632
	1.80783	1.64395
	1.56587	0.331623
	3.01042	3.21509
	2.17243	3.98201
	1.71027	3.302
	2.68928	2.67053
	2.52483	3.15944
	0	0
	0.52504	3.00454
	0	2.88303
	1.19588	2.51244
	0
	0
	0
Average	1.52551	2.1459
SD	1.31631	1.57159
SE	0.299177	0.44745
ttest		0.144249
N	26	23

## Sheet: Supplementary Figure 9
Supplementary Figure 9
Supplementary Figure 9A
Trial	Transgenics	severe defect	modest defect	normal	N	P-value(Chi-square)
Experiment 1*	Body-wall muscle KIN-19::tagRFP	0.793103	0.12069	0.0862069	58
	Body-wall muscle tagRFP	0.145161	0.112903	0.741935	62	p < 0.0001
Experiment 2	Body-wall muscle KIN-19::tagRFP	0.5	0.425	0.075	40
(independent biological replicate)	Body-wall muscle tagRFP	0.285714	0.214286	0.5	28	p = 0.0004
* Shown in 7B
Supplementary Figure 9B
Transgenics	severe defect	normal	N	P-value(Chi-square)
Pharyngeal RHO-1::tagRFP	1	0	47
tagRFP	0	1	34	p < 0.0001
