# Supplementary material for: Intrinsically aggregation-prone proteins form amyloid-like aggregates and contribute to tissue aging in Caenorhabditis elegans
Source: eLife journal article supplement (doi:10.7554/elife.43059), 2019-05-03
Supplement: supp [file elife_poa_e43059_Supplementary_file_2.xlsx]

## Sheet: Sheet1
Supplementary file 2: Pharyngeal pumping and thrashing repeats
Pumping:		Mean Frequency (Hz)	SEM	Ttest	N
Pharyngeal KIN19::tagRFP low aggregation vs high aggregation
Repeat 1* (Day 7)	Low	2.73767	0.171355		23
	High	1.57874	0.205	p < 0.0001	28
Repeat 2 (Day 7)	Low	2.38567	0.163587		27
	High	0.915058	0.194435	p < 0.0001	22
Repeat 3 (Day 7)	Low	3.05273	0.198405		21
	High	1.78875	0.159382	p < 0.0001	21
Wild-type (N2) vs Pharyngeal RHO-1::tagRFP
Repeat 1* (Day 2)	Wild-type	4.208	0.109777		26
	RHO-1	2.2789	0.184067	p < 0.0001	27
Repeat 2 (Day 2)	Wild-type	4.5431	0.42964		21
	RHO-1	2.63934	0.184945	p < 0.001	21
Repeat 3 (Day 2)	Wild-type	4.15494	0.110811		27
	RHO-1	2.65668	0.155984	p < 0.0001	27
Pharyngeal KIN19::tagRFP vs tagRFP
Repeat 1 (Day 6)	tagRFP	2.15615	0.238503		23
	KIN19::tagRFP	2.32485	0.152548	p = 0.56	31
Repeat 2* (Day 8)	tagRFP	2.7103	0.197124		39
	KIN19::tagRFP	2.4314	0.240059	p = 0.38	29
Pharyngeal tagRFP vs N2
Repeat 1* (Day 3)	N2	3.41881	0.243045		26
	Pharyngeal tagRFP	3.45664	0.288842	p = 0.92	27
Repeat 2 (Day 3)	N2	3.79686	0.203099		27
	Pharyngeal tagRFP	3.48039	0.206041	p = 0.28	28
Pharyngeal tagRFP vs N2
Repeat 1 (Day 6)	N2	2.18287	0.436573		25
	Pharyngeal tagRFP	1.87071	0.353532	p = 0.47	28
Repeat 2* (Day 7)	N2	1.52551	0.25815		26
	Pharyngeal tagRFP	2.1459	0.327699	p = 0.14	23
* Repeat shown in Figure
Thrashing:		mean BBPS	SEM	Mann-Whitney test	N
Body-wall muscle KIN-19::tagRFP low aggregation vs high aggregation
Repeat 1* (Day 4)	low	0.771032	0.0162155		38
	high	0.602455	0.020861	p < 0.0001	28
Repeat 2 (Day 4)	low	1.36801	0.0327227		13
	high	1.09055	0.0377083	p < 0.0001	45
Repeat 3 (Day 5)	low	0.888653	0.0240211		44
	high	0.659667	0.0241839	p < 0.0001	33
Body-wall muscle YFP vs RHO-1::Venus
Repeat 1* (Day 4)	YFP	0.986716	0.0213984		50
	RHO-1	1.02214	0.0273897	p = 0.28	61
Repeat 2 (Day 4)	YFP	1.16518	0.026105		57
	RHO-1	1.16464	0.0244646	p = 0.21	46
Repeat 3 (Day 3)	YFP	1.04477	0.0283663		34
	RHO-1	1.06871	0.0244017	p = 0.68	36
Body-wall muscle KIN-19::tagRFP
Repeat 1* (Day 4)	tagRFP	1.13084	0.0287746	vs KIN-19 p < 0.0001	39
	N2	1.04777	0.0275353	vs tagRFP p = 0.07	42
	KIN-19::tagRFP	0.914657	0.0227848	vs N2 p < 0.0001	38
Repeat 2 (Day 4)	N2	1.10127	0.044672		33
	KIN-19::tagRFP	0.956635	0.035289	vs N2 p < 0.001	33
Repeat 3 (Day 4)	N2	1.2726	0.0552362		42
	KIN-19::tagRFP	0.902702	0.063059	vs N2 p < 0.0001	35
Repeat 4 (Day 4)	tagRFP	0.994865	0.0224146		38
	KIN-19::tagRFP	0.942762	0.0255522	vs tagRFP p = 0.11	39
Repeat 5 (Day 4)	tagRFP	0.867523	0.0254307		43
	KIN-19::tagRFP	0.767097	0.0195014	vs tagRFP p= 0.02	63
* Repeat shown in Figure
