# Supplementary material for: Intrinsically aggregation-prone proteins form amyloid-like aggregates and contribute to tissue aging in Caenorhabditis elegans
Source: eLife journal article supplement (doi:10.7554/elife.43059), 2019-05-03
Supplement: supp [file elife_poa_e43059_Supplementary_file_3.xlsx]

## Sheet: Sheet1
Supplementary file 3: parameters for thrashing analysis
Input values of wrMTrck_Batch
fileType	1
imageType	0
backSub	3
fixedThresh	0
threshMode	Ostu
skeletonize	0
movieDuration	30
fps	15
pixPrMm	0
minSize	10
maxSize	400
maxVelocity	15
maxAreaChange	30
minTrackLength	20
bendThreshold	1
bendDetect	2
rawData	0
delFirst	0
